# Supplementary material for: Sb deficiencies control hole transport and boost the thermoelectric performance of p-type AgSbSe2
Source: Royal Society of Chemistry journal article supplement (doi:10.1039/c5tc01429h), 2015-01-01
Supplement: c5tc01429h1.pdf [file c5tc01429h1.pdf]

## ***Electronic Supplementary Information (ESI)***

### **Sb Deficiencies Control Hole Transport and Boost the Thermoelectric Performance of *p*-type AgSbSe<sub>2</sub><sup>†</sup>**

Satya N. Guin and Kanishka Biswas\*

*New Chemistry Unit*

*Jawaharlal Nehru Centre for Advanced Scientific Research (JNCASR),*

*Jakkur P.O., Bangalore 560064, India*

*\*Email: kanishka@jncasr.ac.in*

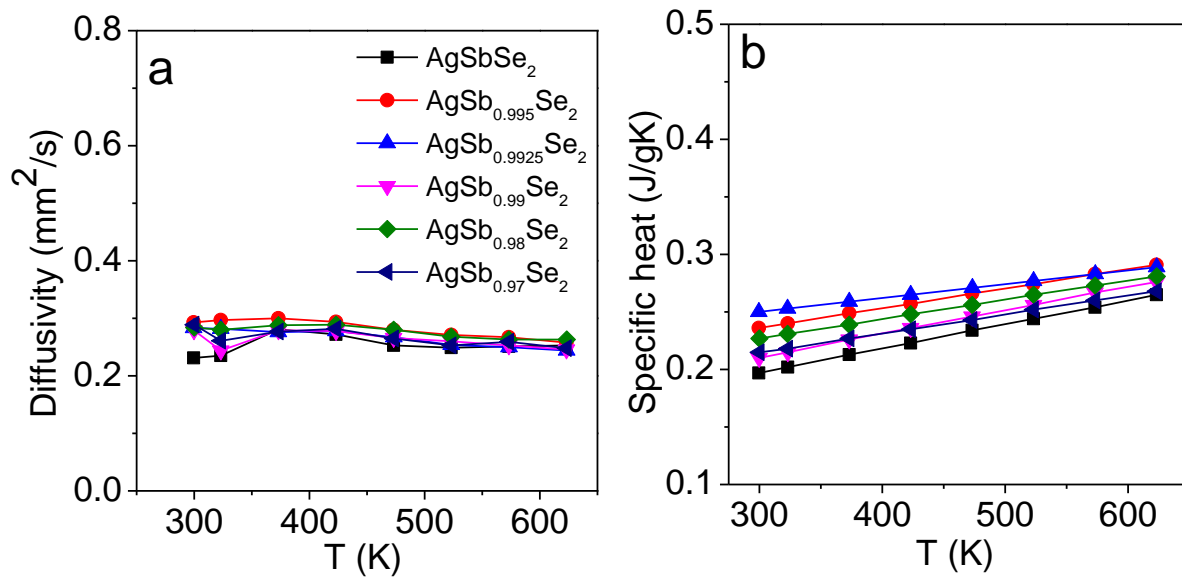

**Fig. S1** Temperature dependent (a) thermal diffusivity and (b) heat capacity of AgSb<sub>1-x</sub>Se<sub>2</sub> (x= 0- 3 mol%) samples.

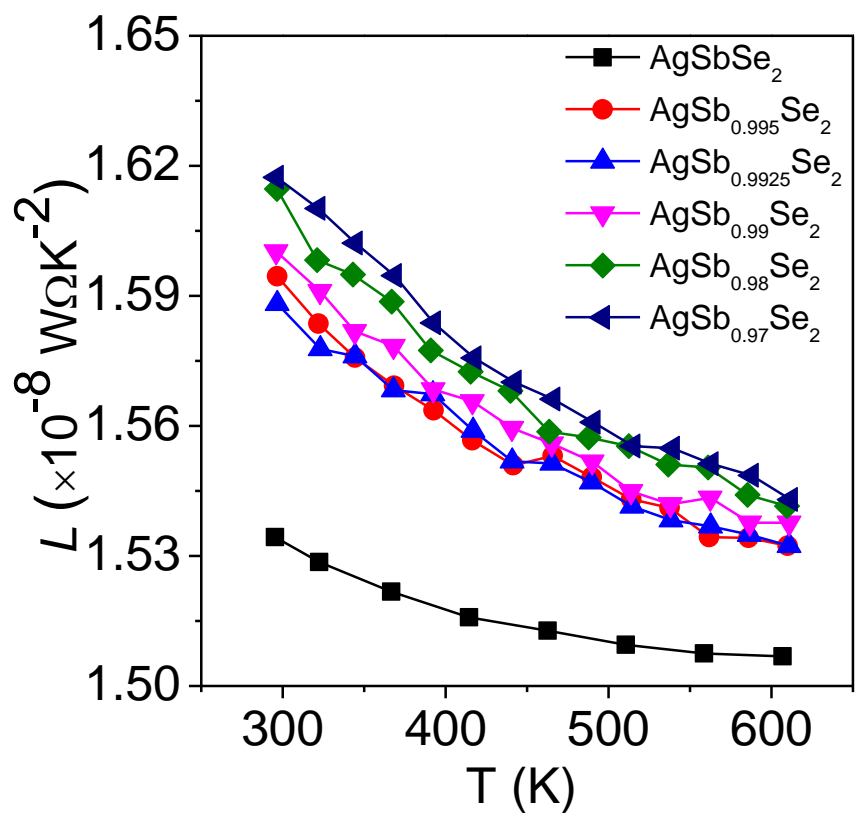

**Fig. S2** Temperature dependent Lorentz number of  $\text{AgSb}_{1-x}\text{Se}_2$  ( $x=0-3$  mol%) samples.

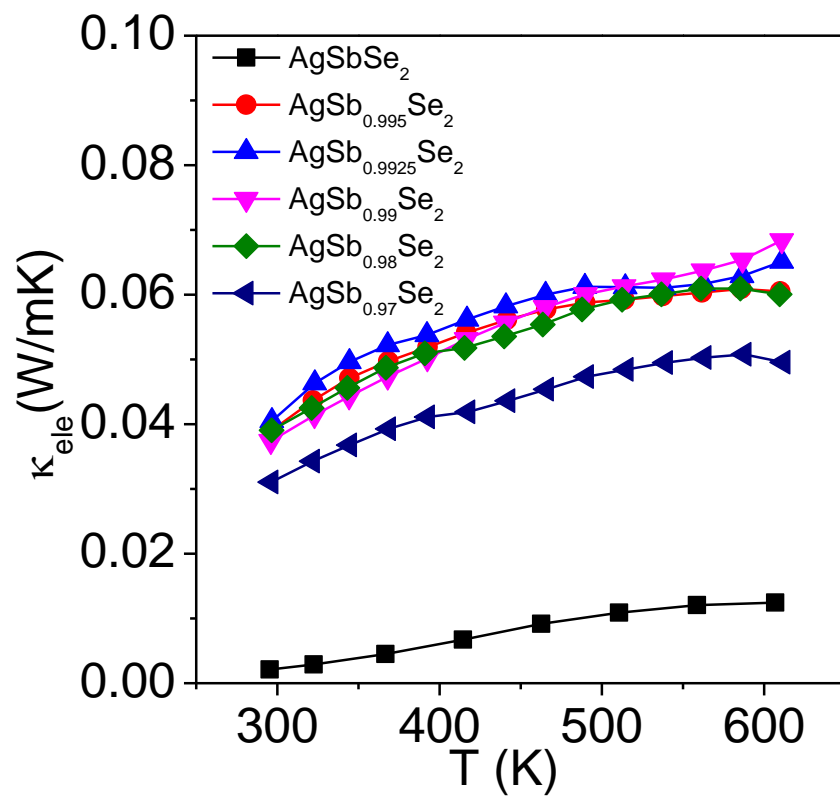

**Fig. S3** Temperature dependent electronic thermal conductivity ( $\kappa_{lat}$ ) of  $\text{AgSb}_{1-x}\text{Se}_2$  ( $x=0-3$  mol%) samples.

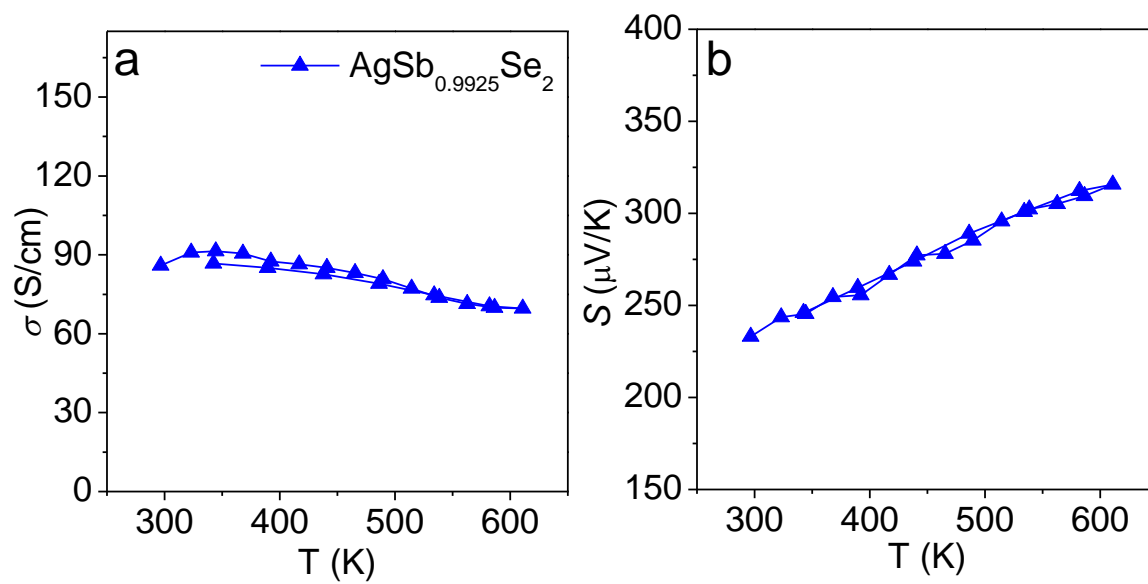

**Fig. S4** Temperature dependent heating cooling cycle electrical conductivity ( $\sigma$ ) and Seebeck coefficient ( $S$ ) of  $\text{AgSb}_{0.9925}\text{Se}_2$  sample.
